# Supplementary material
Source: publisher figshare collection journal article supplement (https://acs.figshare.com/ndownloader/files/26843110)
Supplement: Supplementary file 1 [file 26843110]

Permanganometric Titration for the Quantification of Purified bis(2,4,4-trimethylpentyl)dithiophosphinic acid in *n*-dodecane: Supplemental Information

Nathan P. Bessen<sup>a</sup>, Erin R. Bertelsen<sup>b</sup>, Jenifer C. Shafer<sup>a\*</sup>

a: Colorado School of Mines, 1500 Illinois St, Golden, CO 80401

b: University of Massachusetts Lowell, 220 Pawtucket St, Lowell, MA 01854

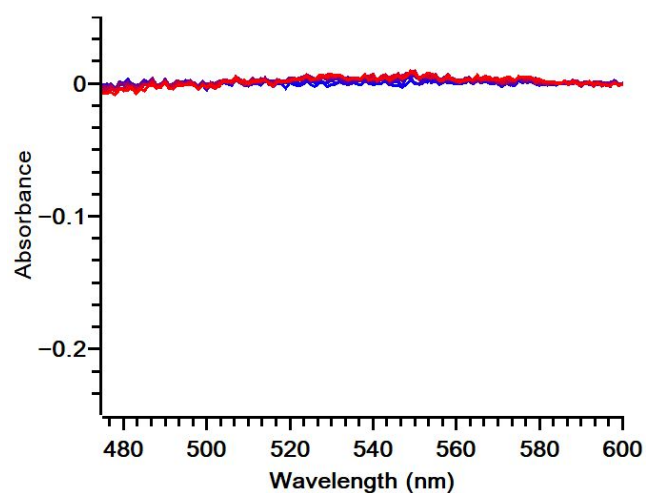

**Figure S1.** Spectra of  $\text{KMnO}_4$  in acetone after addition of dodecane and mixing for 15 seconds. After each addition of 0 to 60  $\mu\text{L}$  of dodecane, the  $\text{KMnO}_4$  solution in both the sample and reference cells was replaced with a freshly prepared solution for the next addition. Spectra with less dodecane added are shown in blue and those with more are shown in red.
